# Supplementary material for: Associations between seven-year C-reactive protein trajectory or pack-years smoked with choroidal or retinal thicknesses in young adults
Source: PubMed Central journal article supplement (PMC7969753; doi:10.1038/s41598-021-85626-3), 2021-03-17

**Associations between seven-year C-reactive protein trajectory or pack-years smoked with choroidal or retinal thicknesses in young adults**

**Authors:** Samantha Sze-Yee Lee<sup>1</sup>; Darren John Beales<sup>2</sup>; Fred K Chen<sup>1,3</sup>; Seyhan Yazar<sup>1,4</sup>; David Alonso-Caneiro<sup>5</sup>; David A Mackey<sup>1,6,7</sup>

<sup>1</sup>Centre for Ophthalmology and Visual Science (incorporating Lions Eye Institute,), University of Western Australia, Western Australia, Australia

<sup>2</sup>School of Physiotherapy and Exercise Science, Curtin University, Western Australia, Australia

<sup>3</sup>Department of Ophthalmology, Royal Perth Hospital, Western Australia, Australia

<sup>4</sup>Single Cell and Computational Genomics Lab, Garvan Institute of Medical Research, New South Wales, Australia

<sup>5</sup>Queensland University of Technology (QUT), Contact Lens and Visual Optics Laboratory, Centre for Vision and Eye Research, School of Optometry and Vision Science, Queensland, Australia

<sup>6</sup>Centre for Eye Research Australia, University of Melbourne, Royal Victorian Eye and Ear Hospital, Victoria, Australia

<sup>7</sup>School of Medicine, Menzies Research Institute Tasmania, University of Tasmania, Tasmania, Australia

**Supplementary figure S1.** Box plots of C-reactive protein at each follow-up according to trajectory class

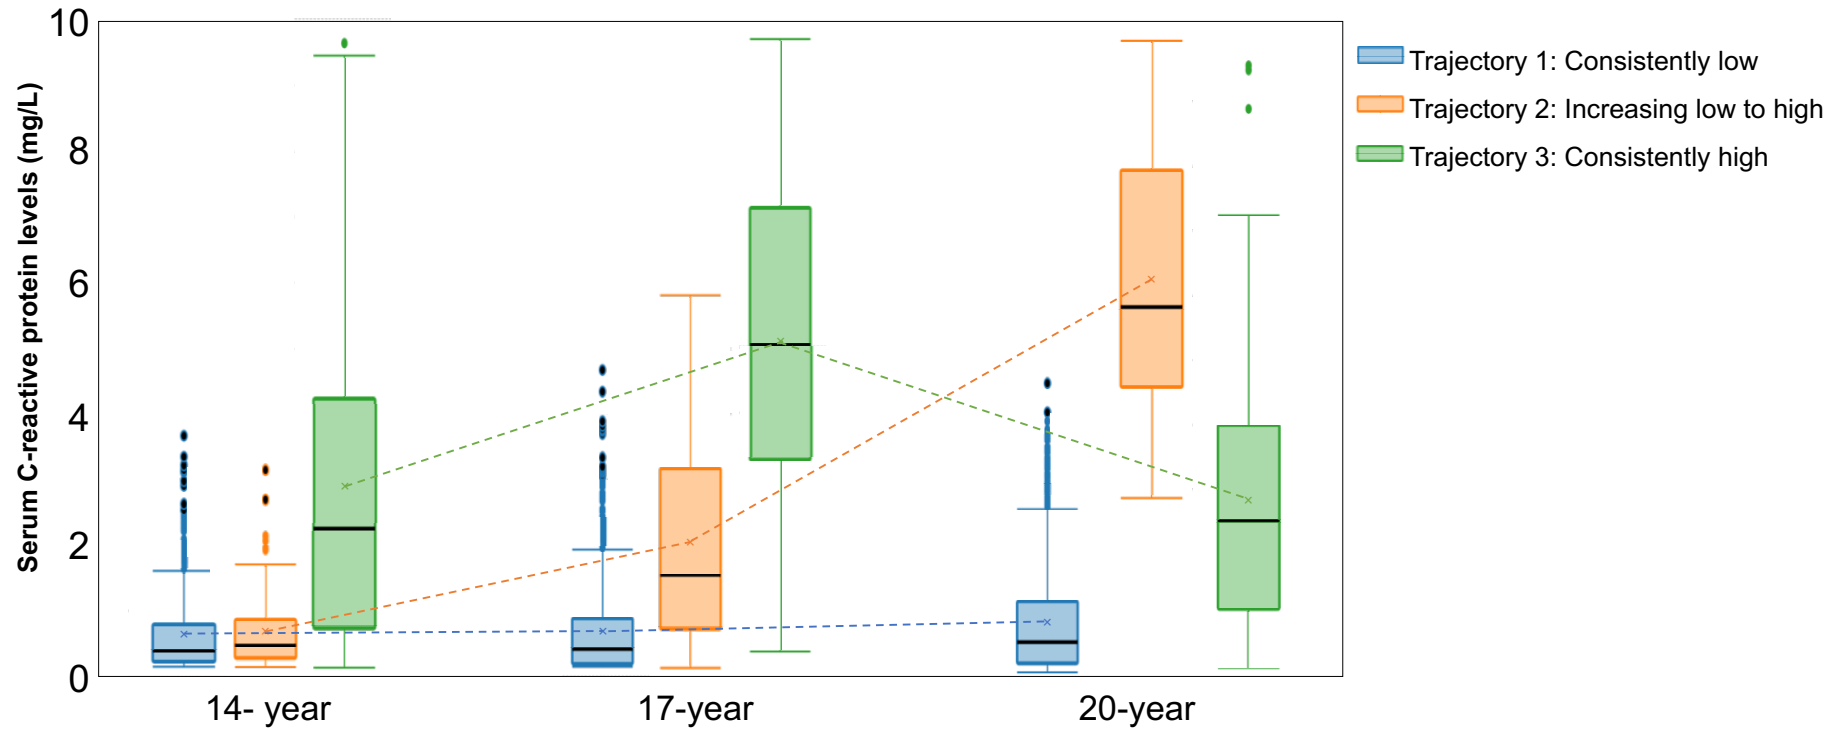

Supplement: 41598_2021_85626_MOESM1_ESM.pdf [file 41598_2021_85626_MOESM1_ESM.pdf]
